# Supplementary material for: Who Bites the Bullet First? The Susceptibility of Leopards Panthera pardus to Trophy Hunting
Source: PubMed Central journal article supplement (PMC4393264; doi:10.1371/journal.pone.0123100), 2015-04-10

# TROPHY HUNTER SELECTIVITY SURVEY

Below are photographs of known-age male & female leopards. Please indicate whether you would hunt the leopard on:

- A) the 1<sup>st</sup> day of a 14-day safari,
- B) the 7<sup>th</sup> day of a 14-day safari,
- C) the 14<sup>th</sup> day of a 14-day safari, or
- D) at no stage during the safari (i.e. you would not hunt the leopard).

**(1)**

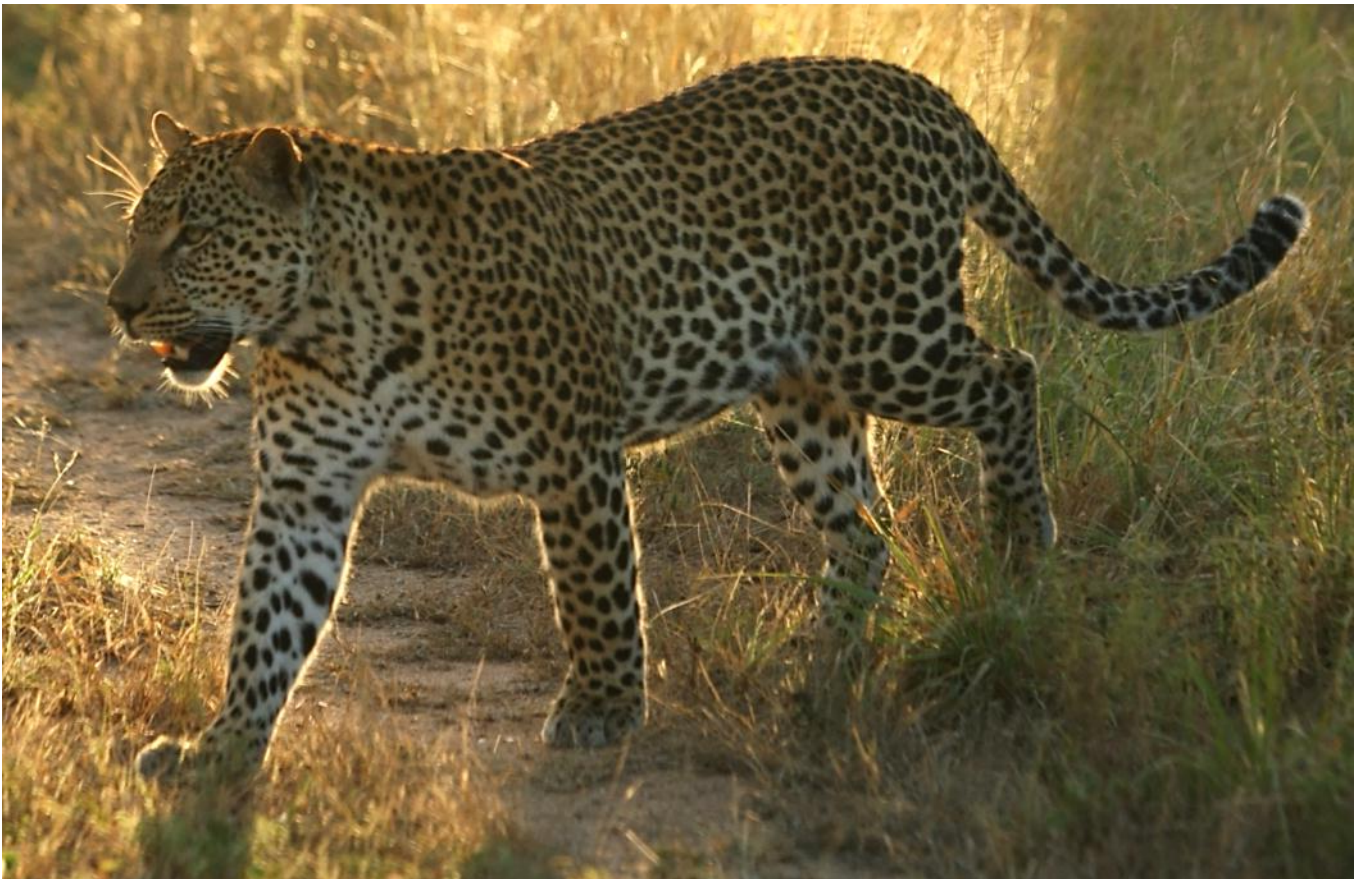

(2)

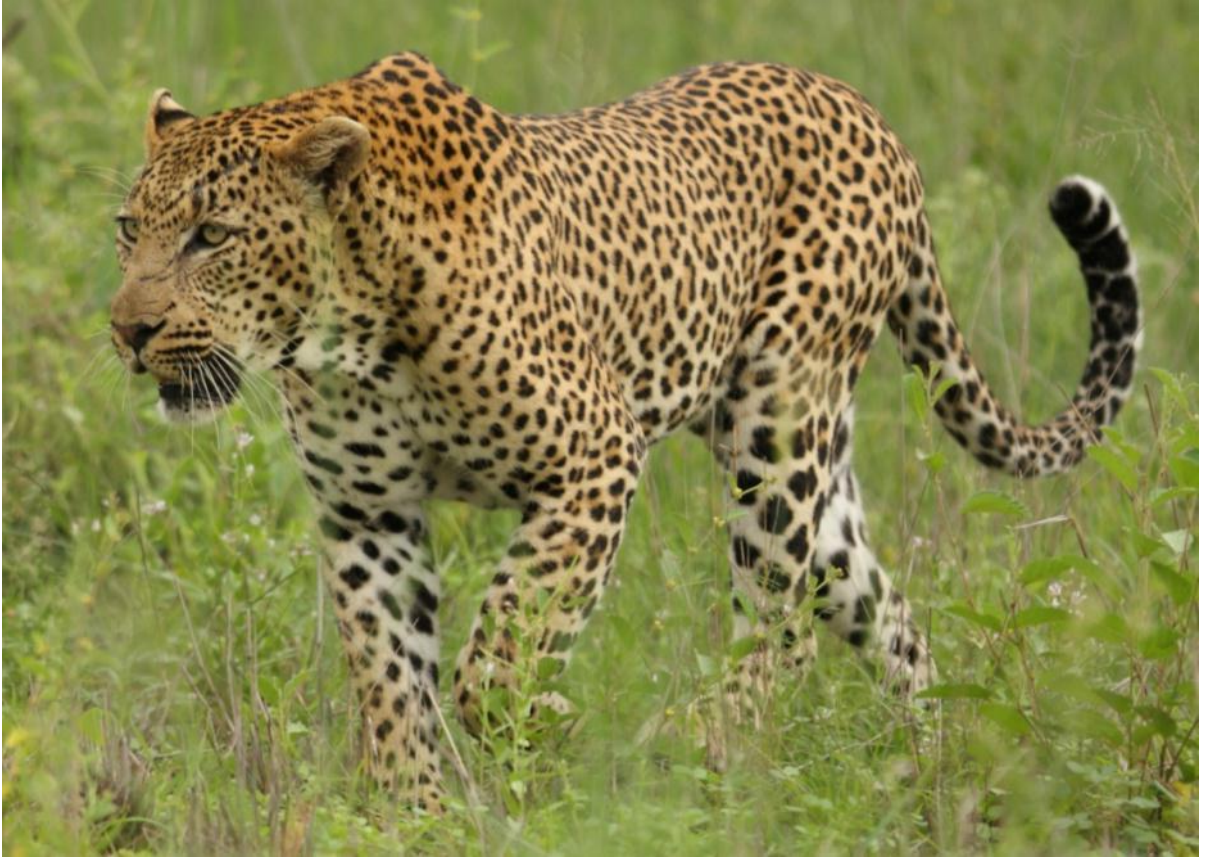

(3)

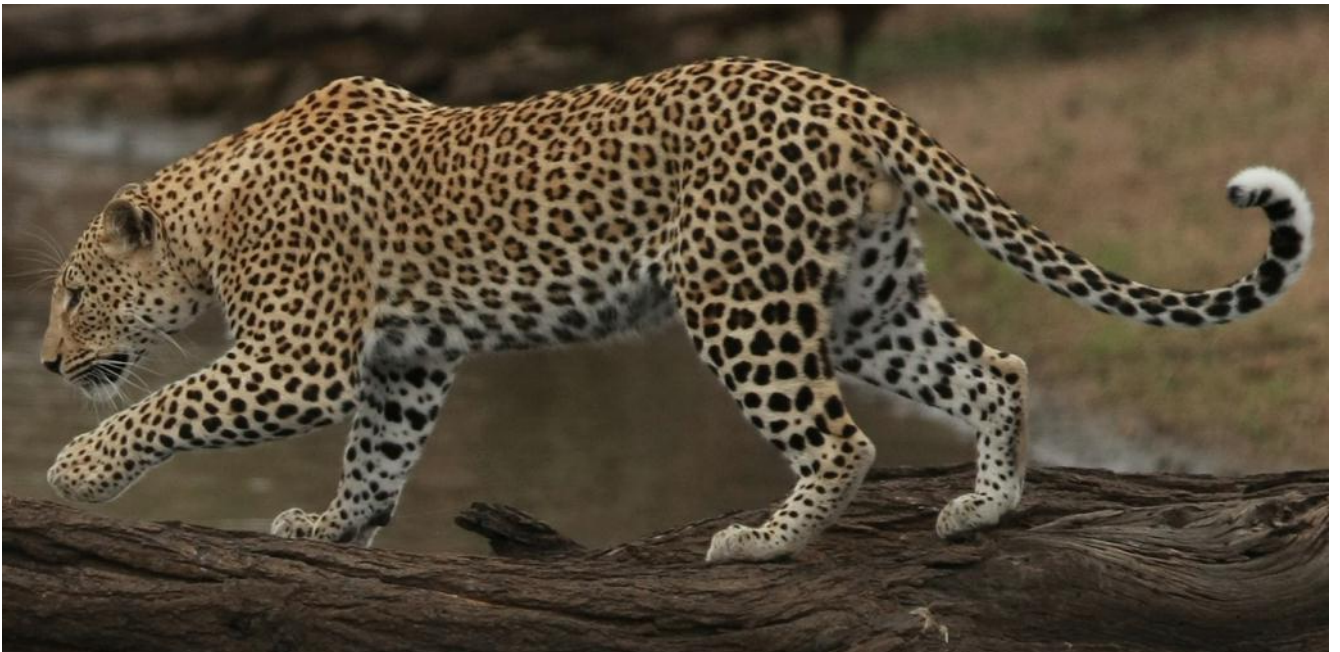

(4)

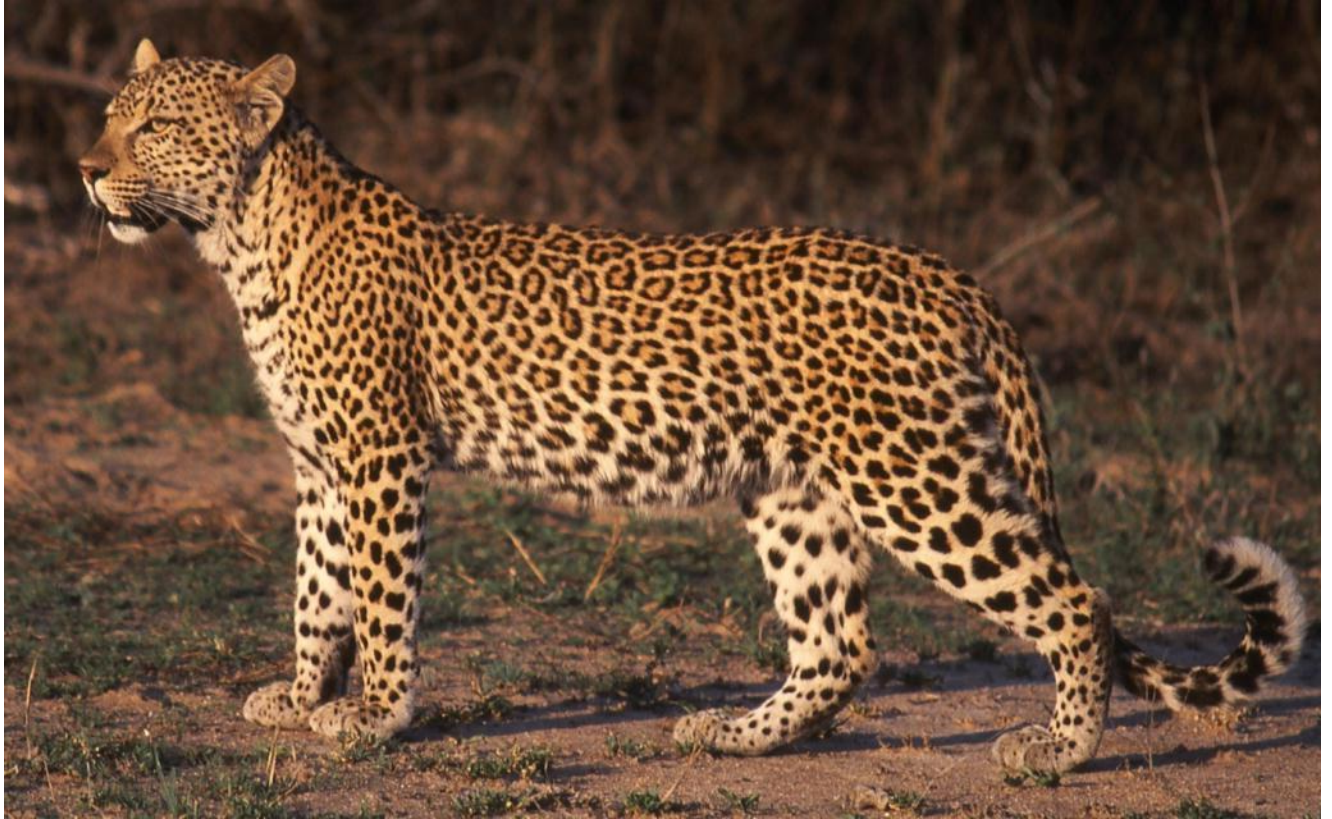

(5)

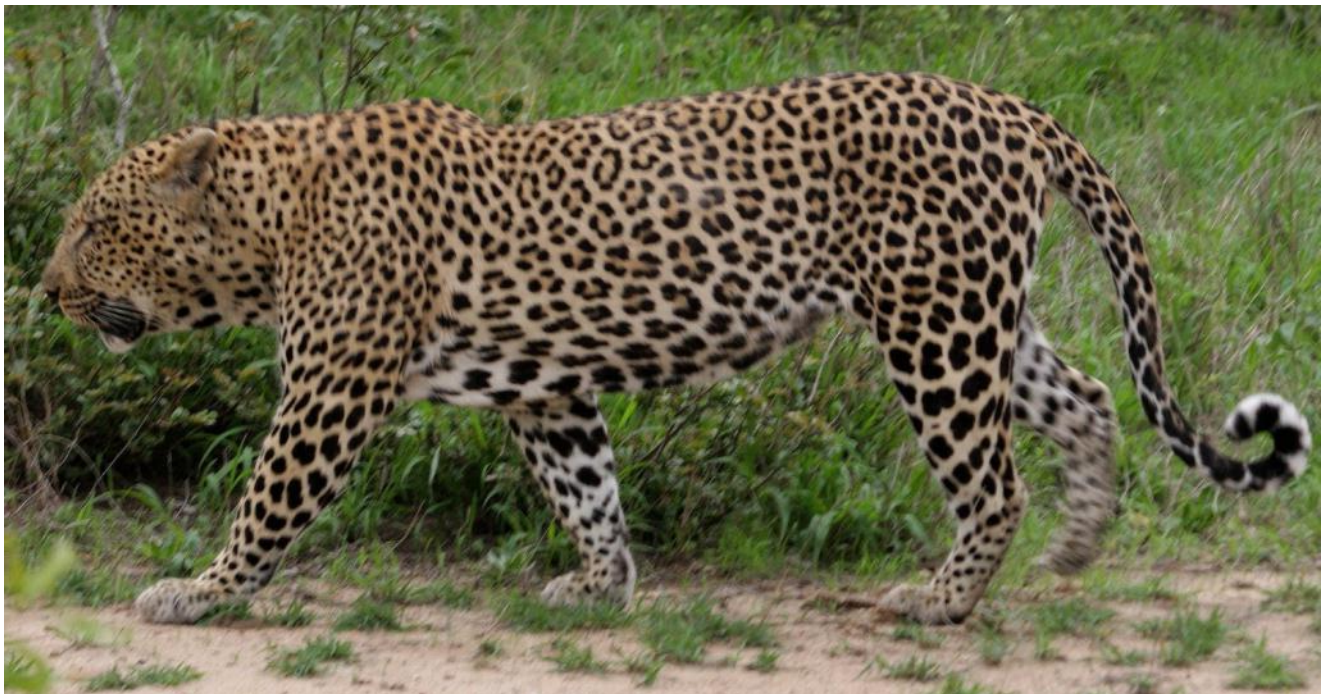

(6)

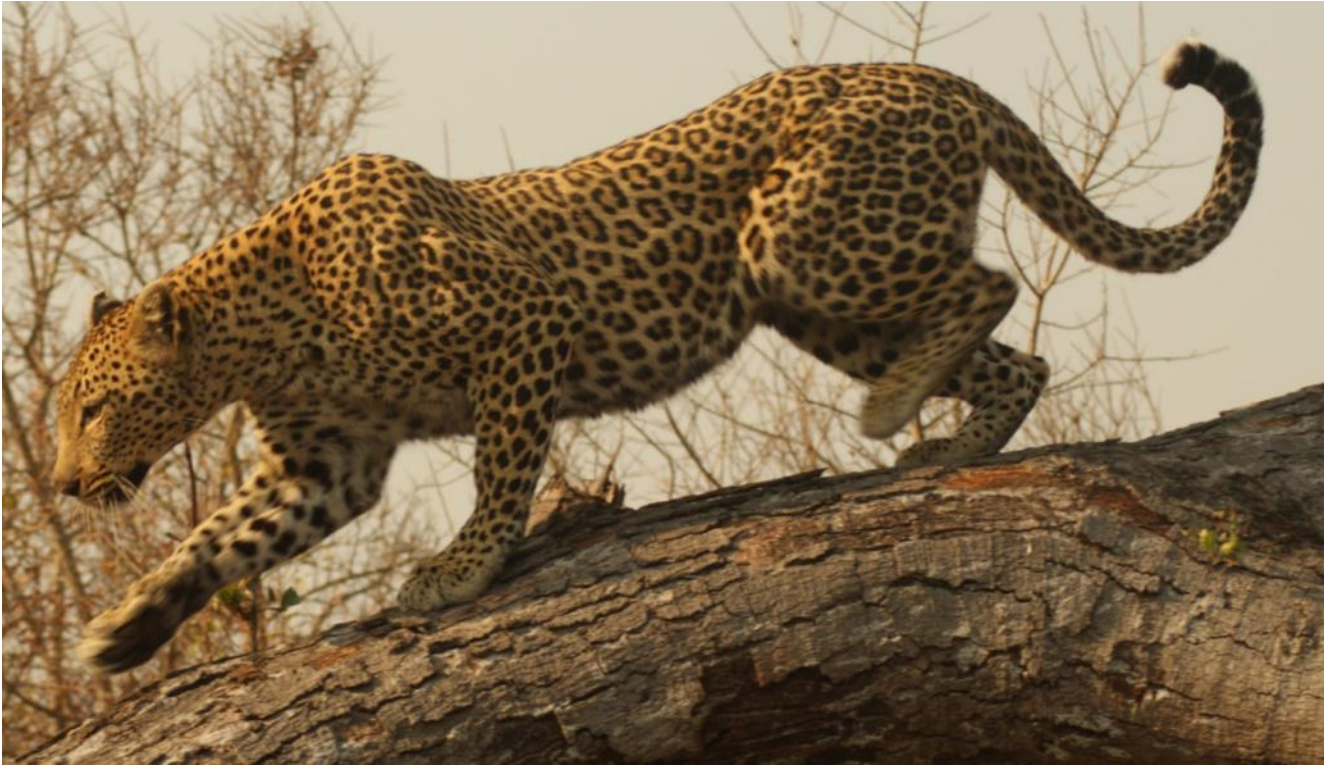

(7)

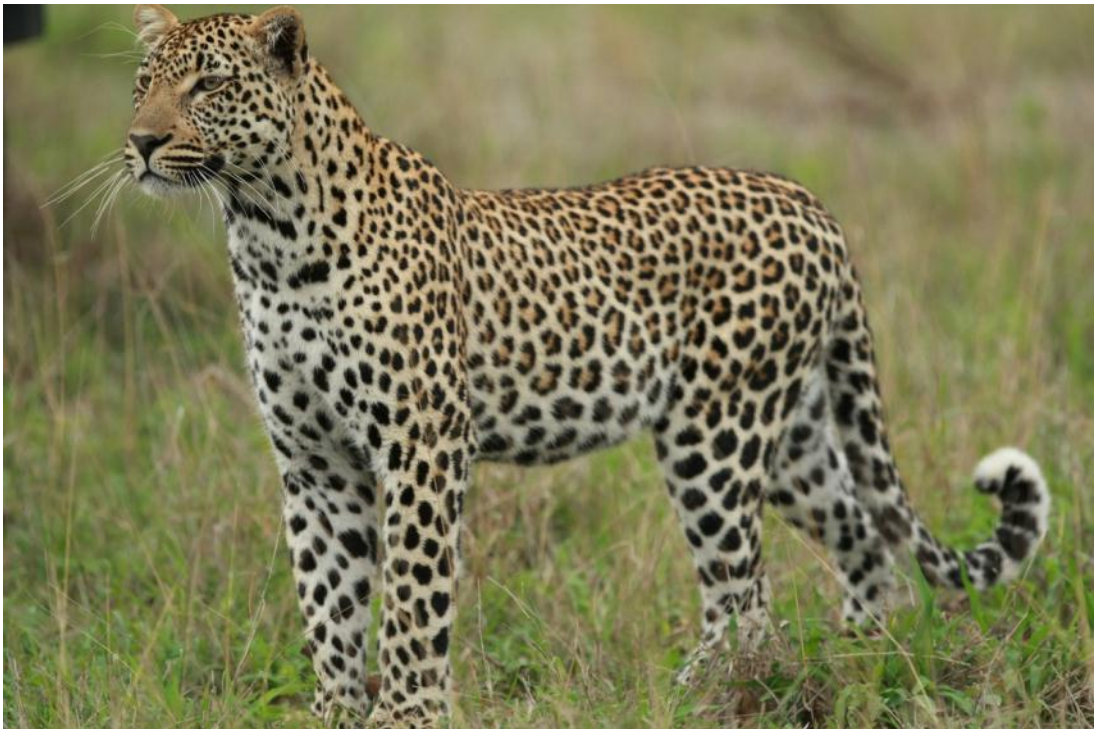

(8)

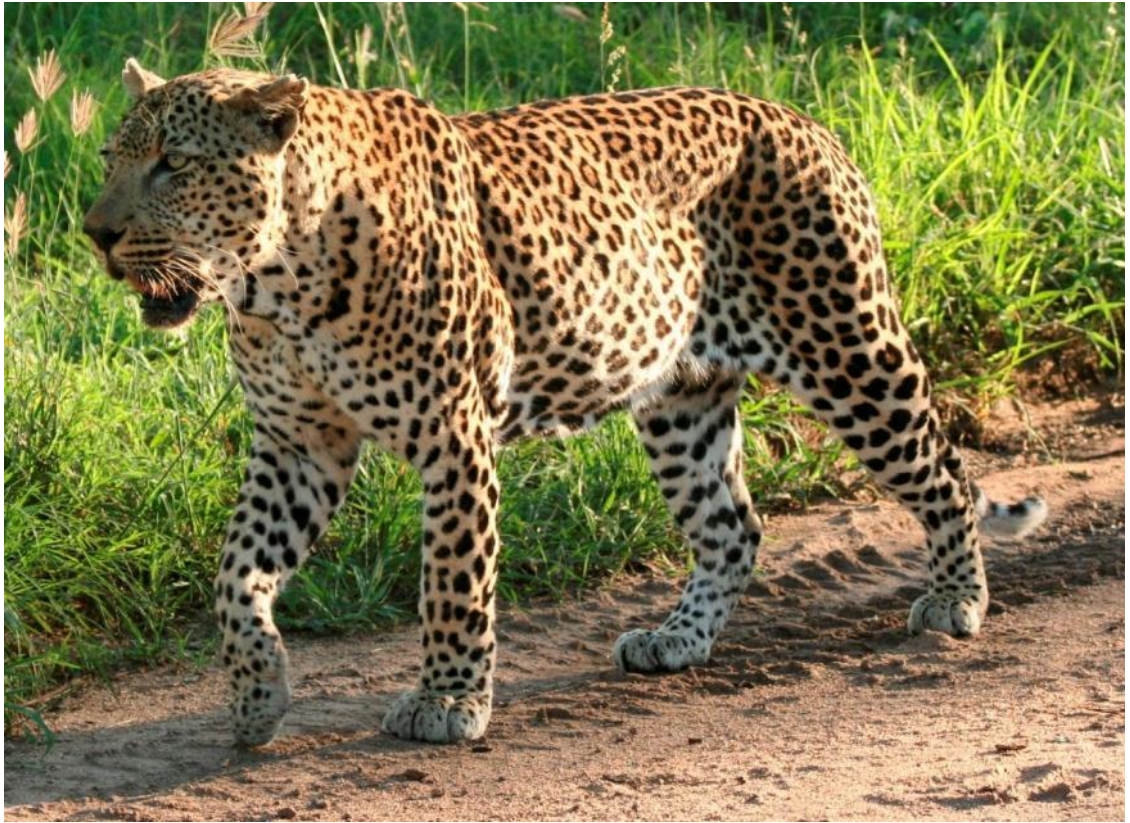

(9)

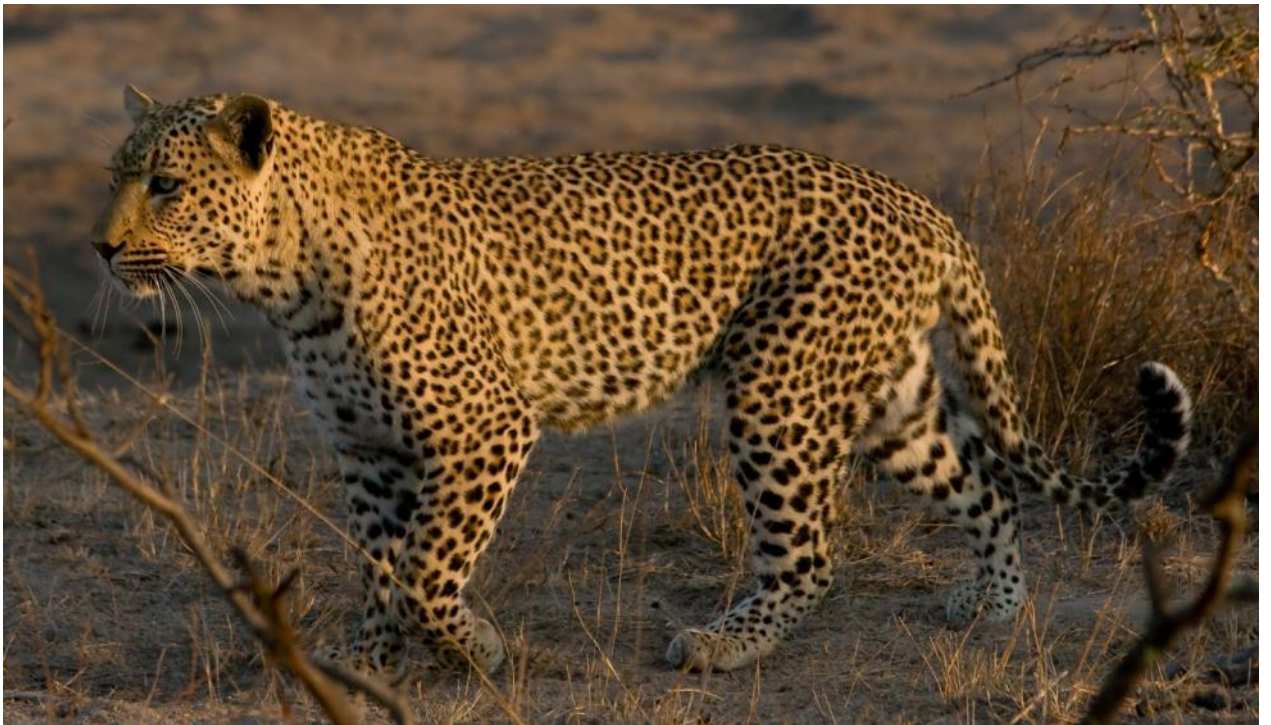

**(10)**

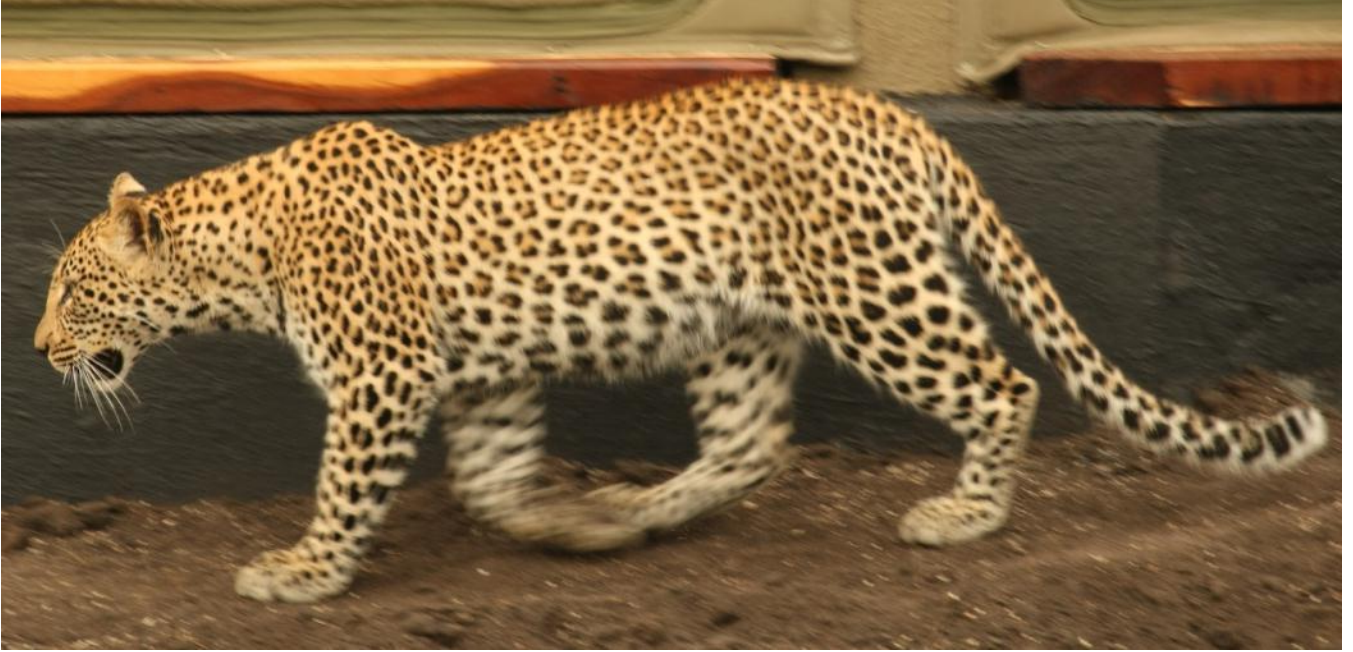

**(11)**

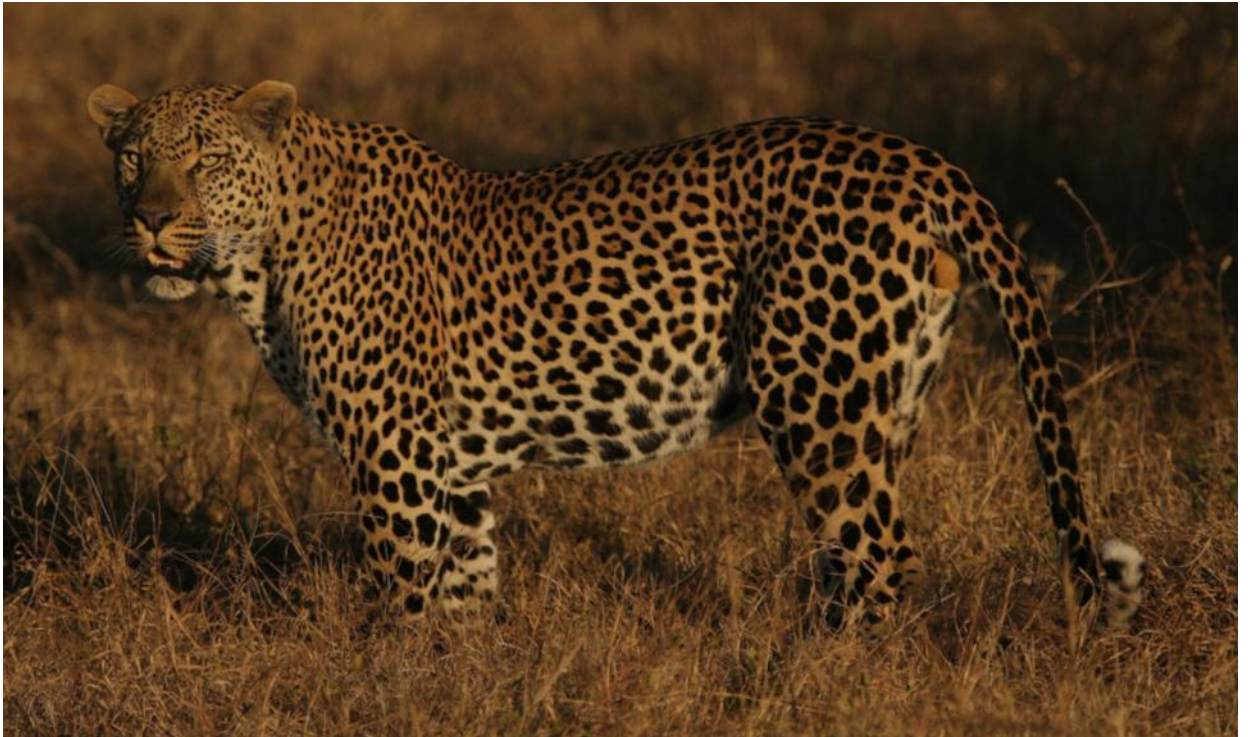

**(12)**

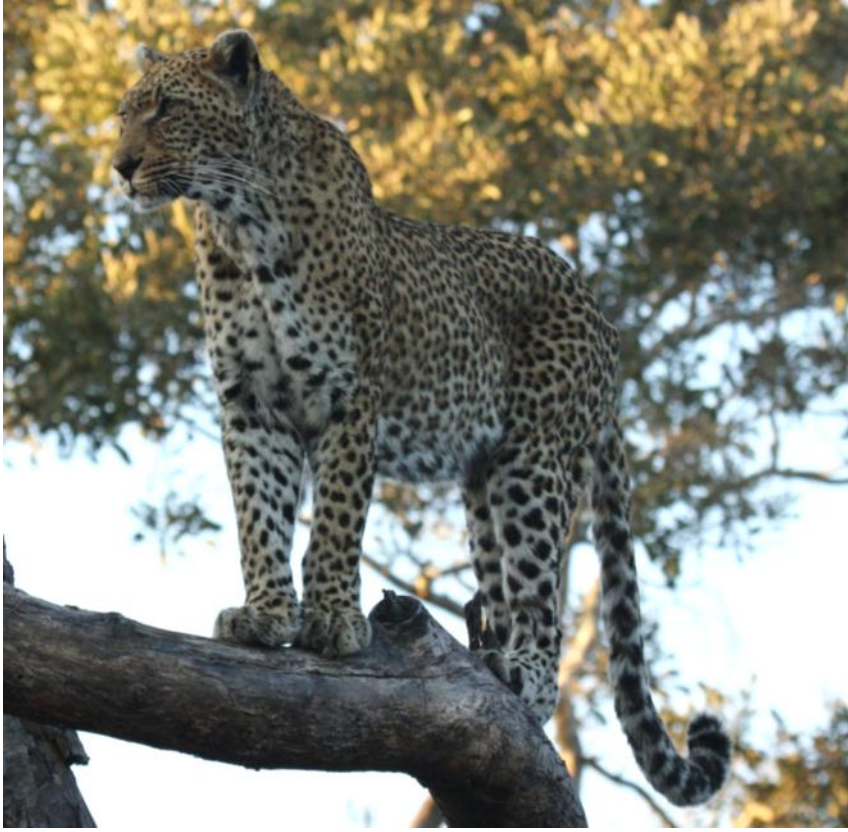

**(13)**

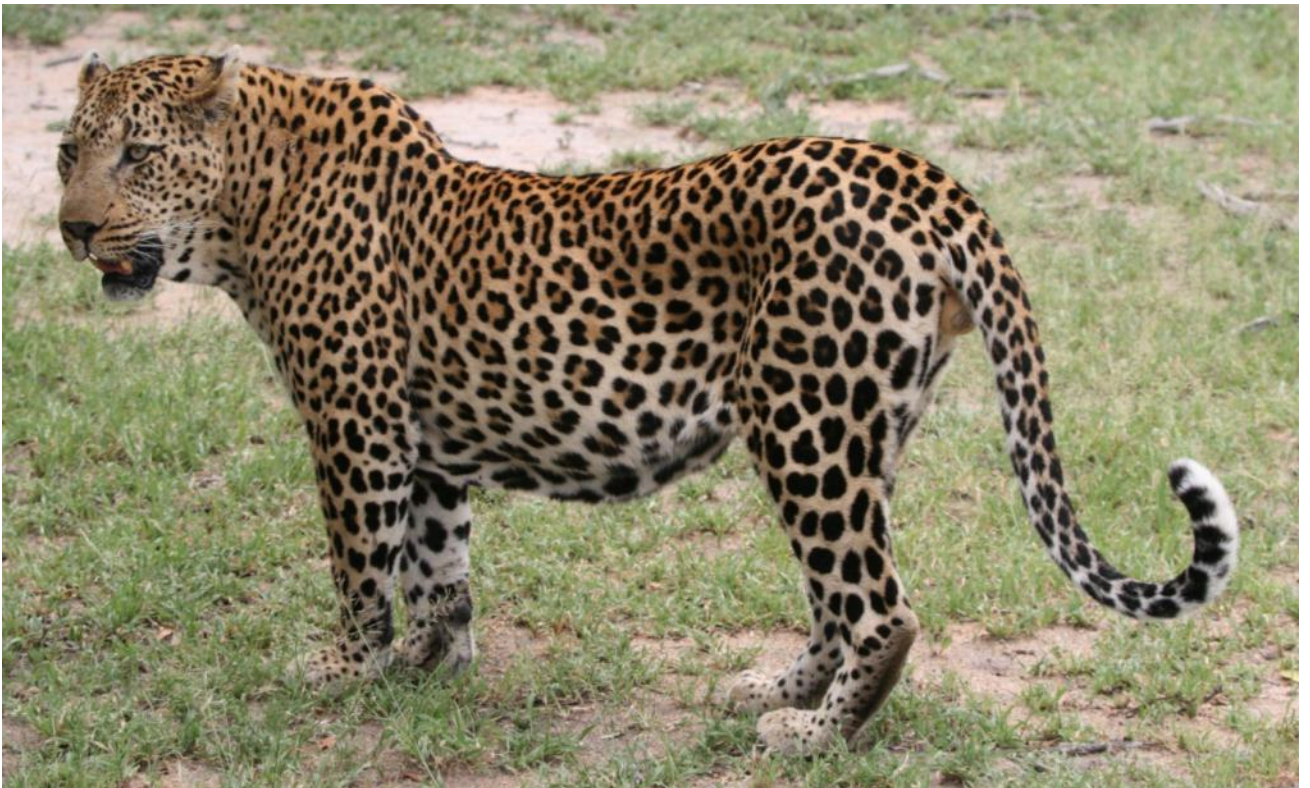

(14)

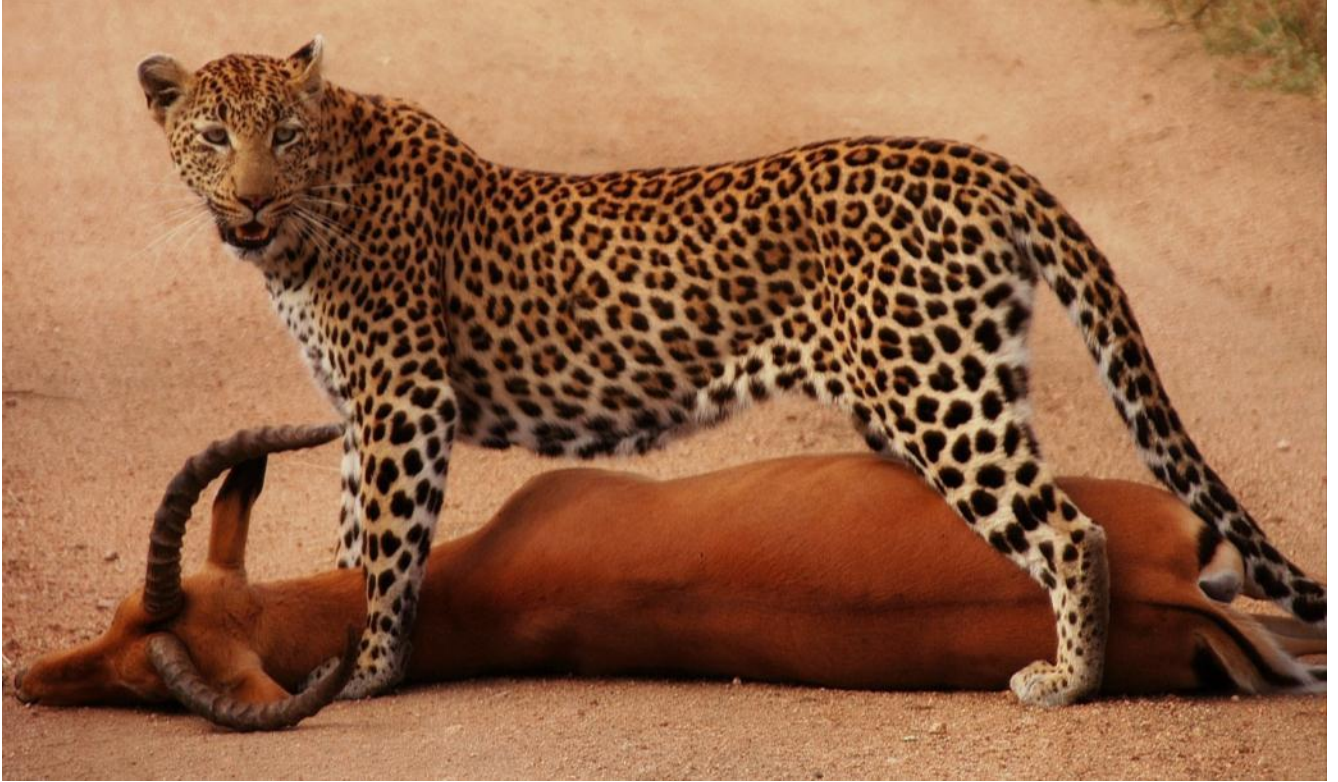

(15)

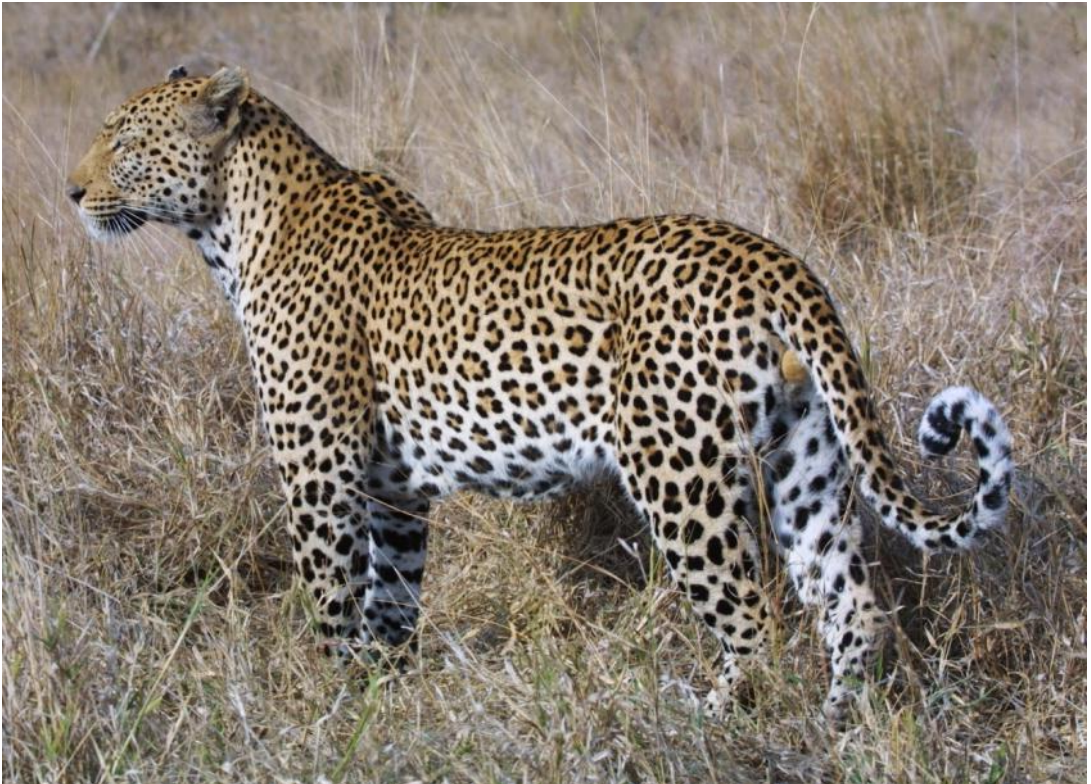



**(16)**

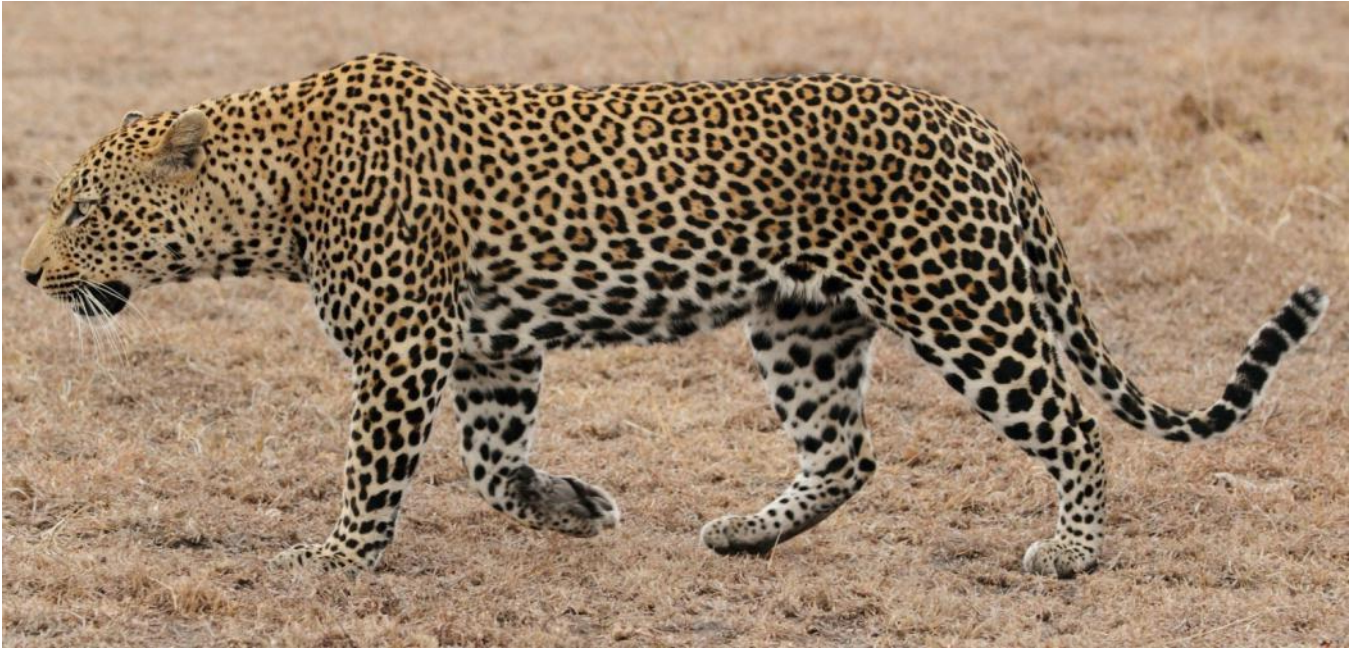

**(17)**

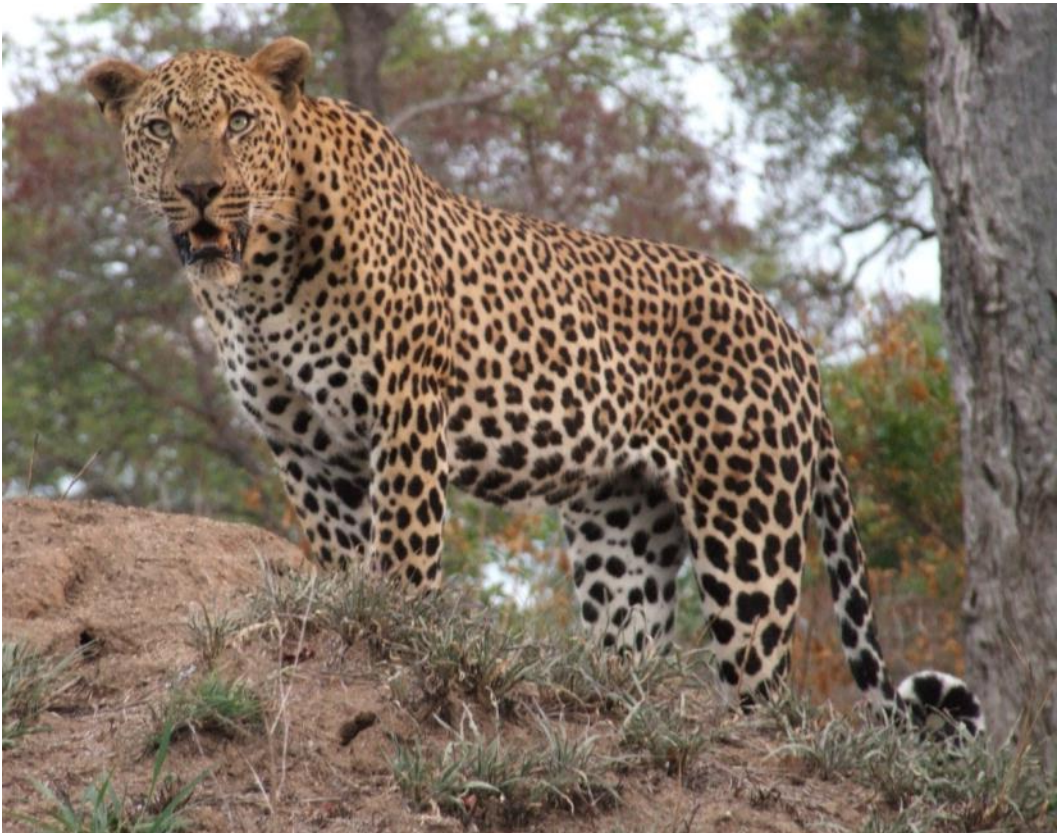

**(18)**

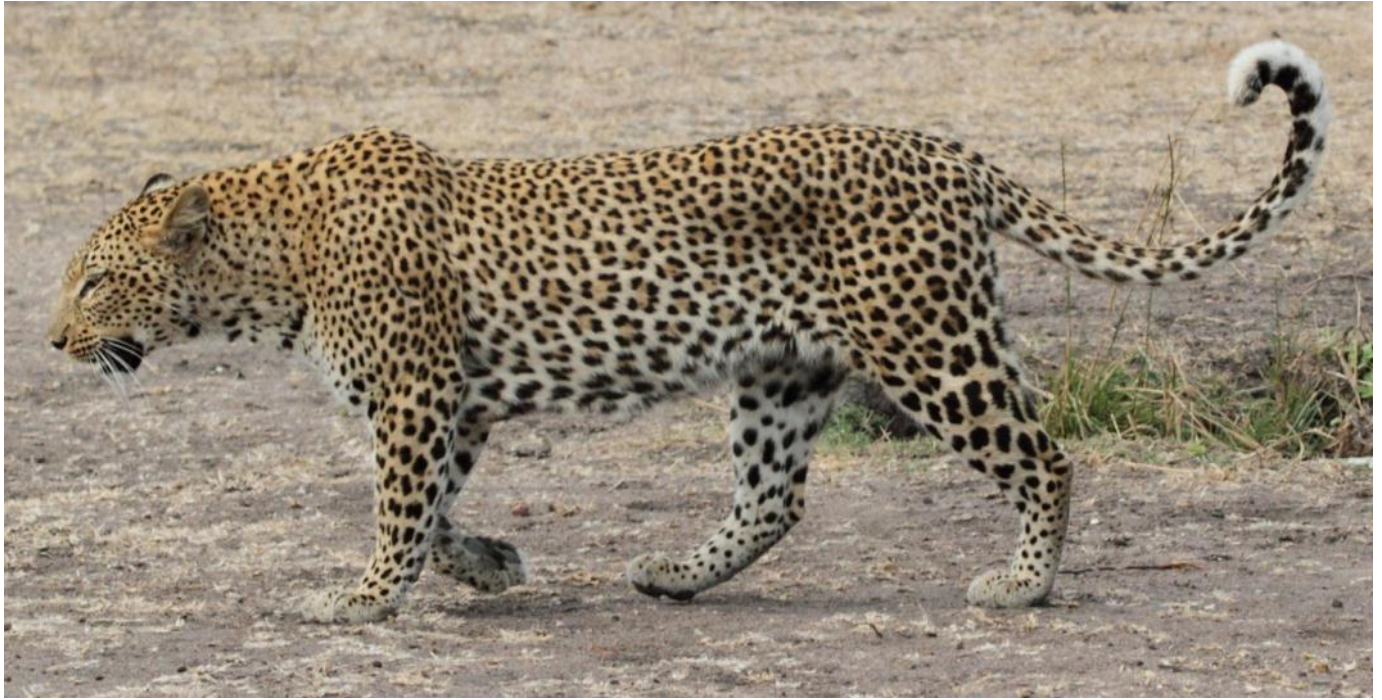

**(19)**

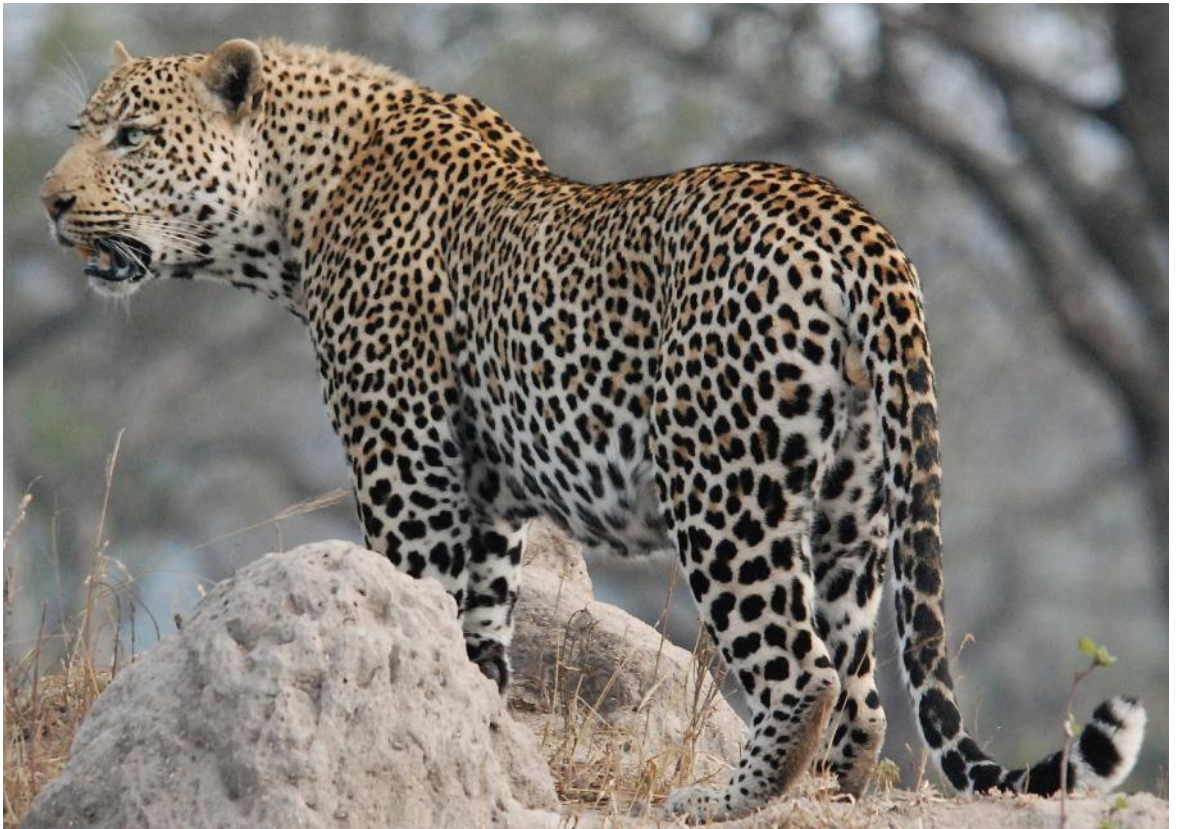

(20)

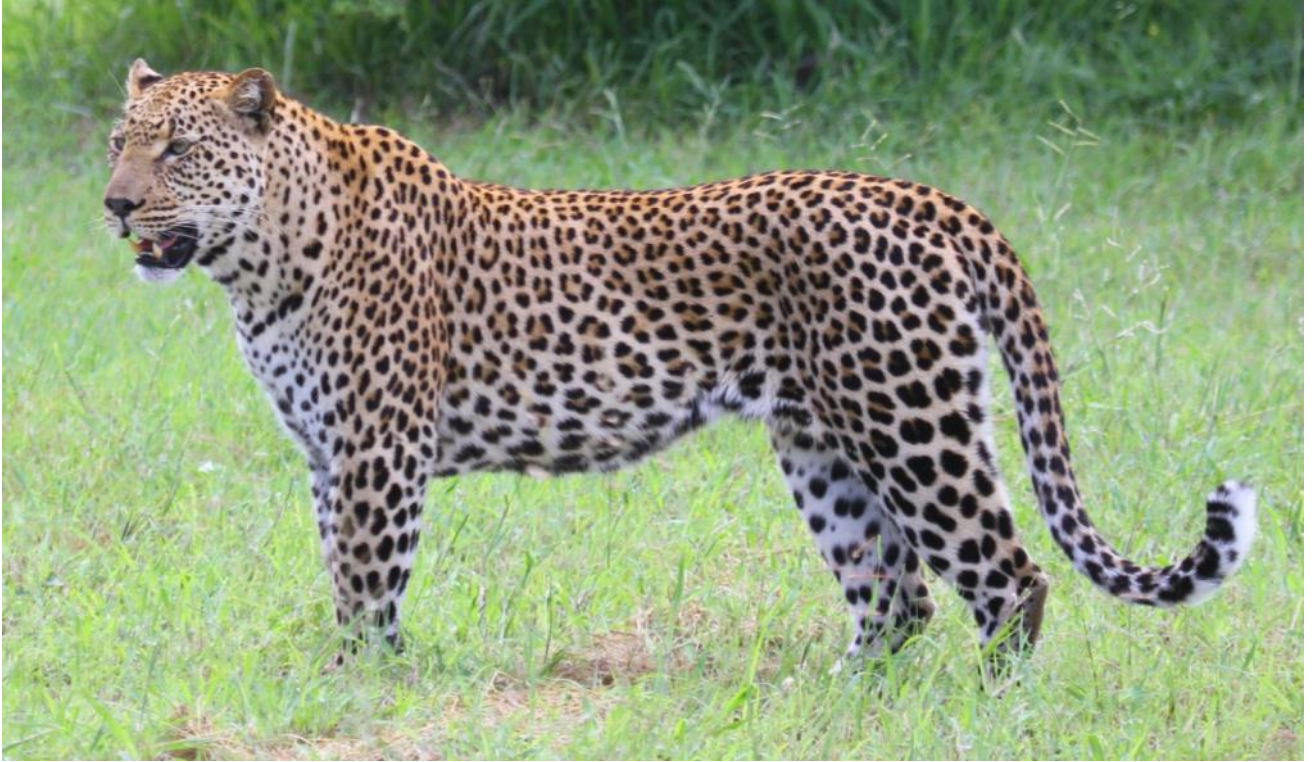

(21)

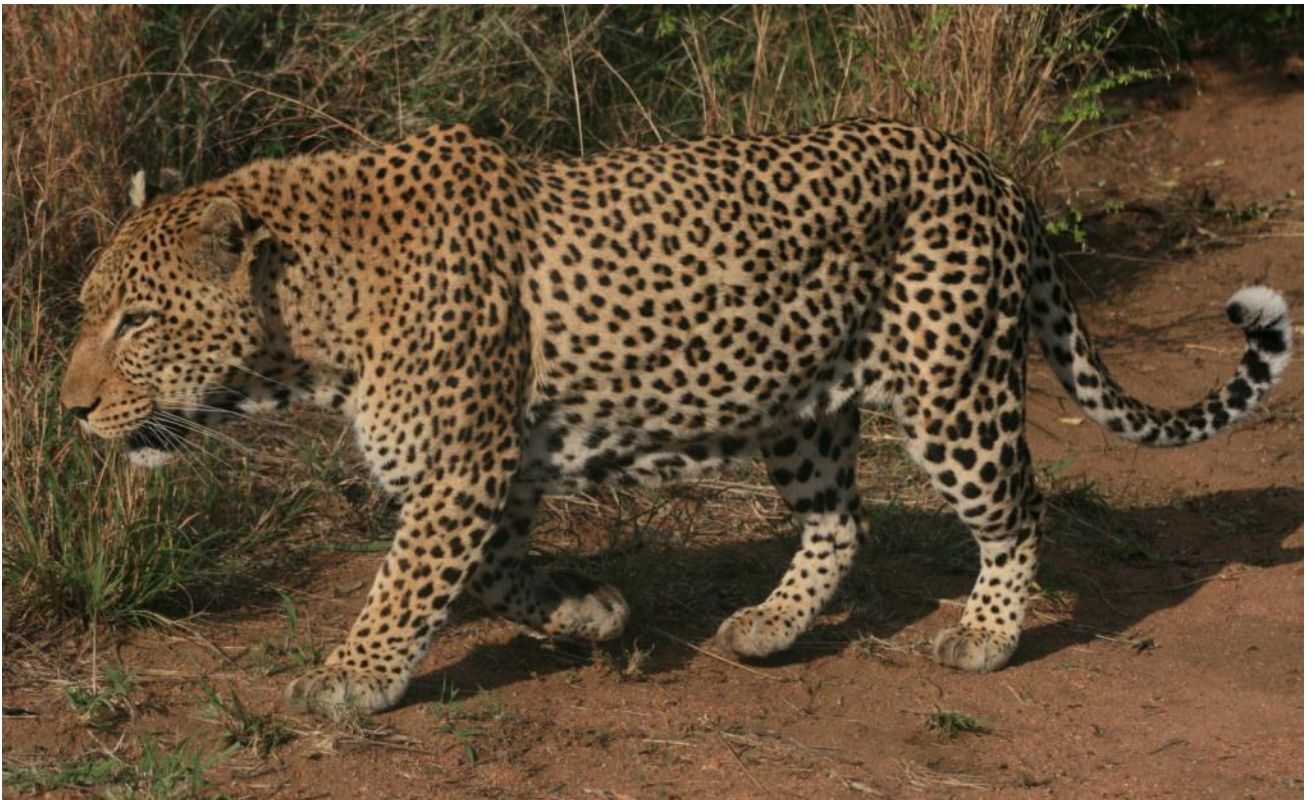

(22)

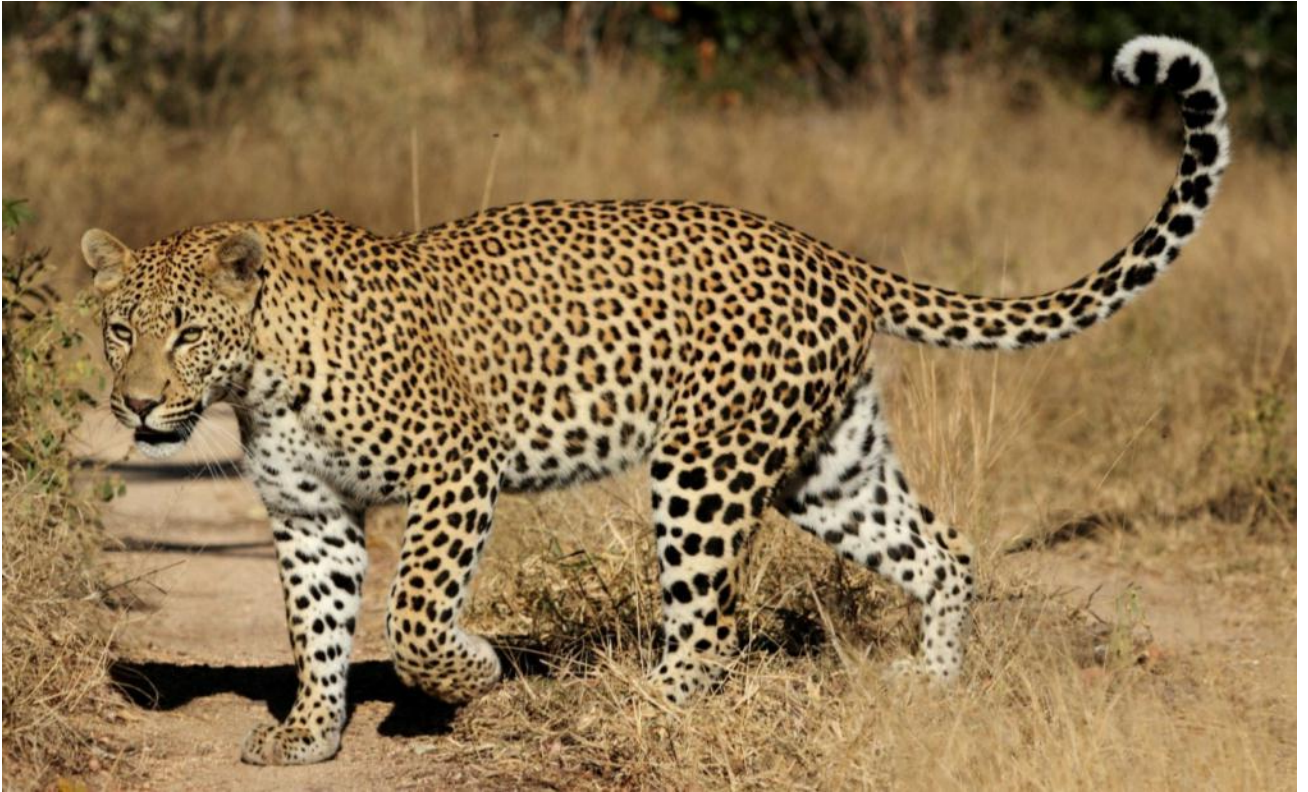

(23)

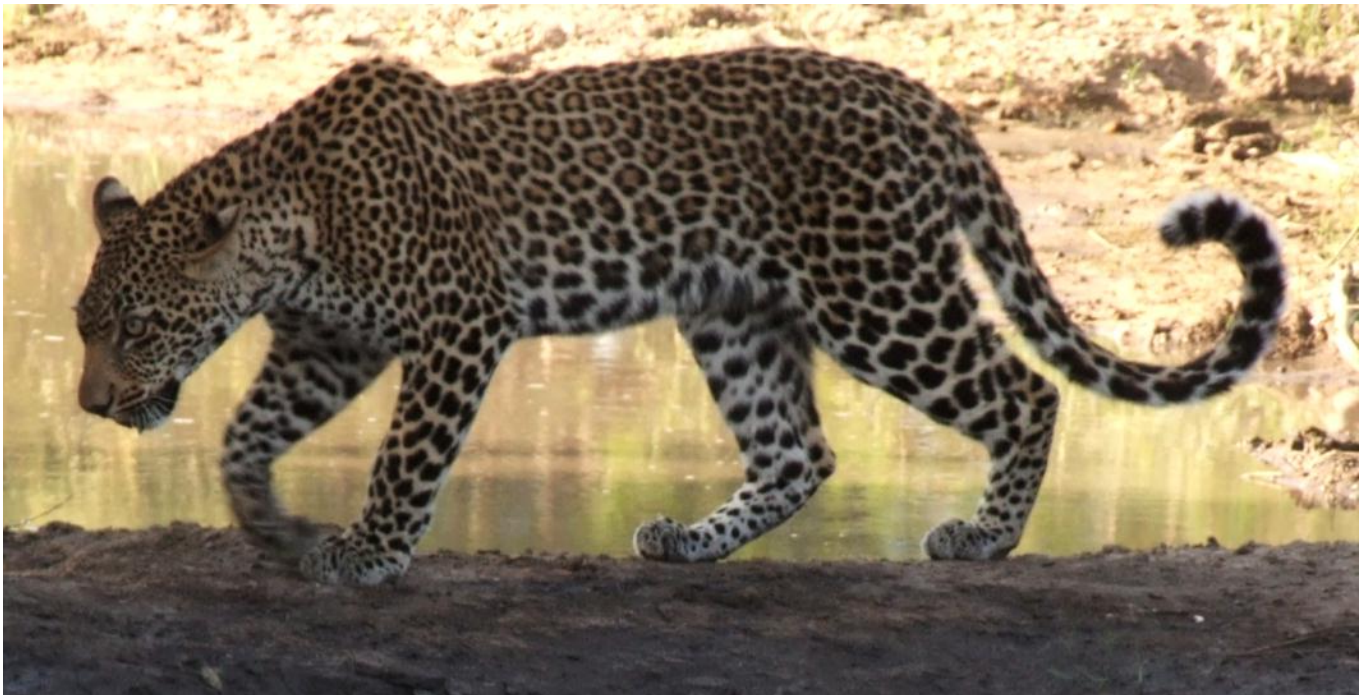

(24)

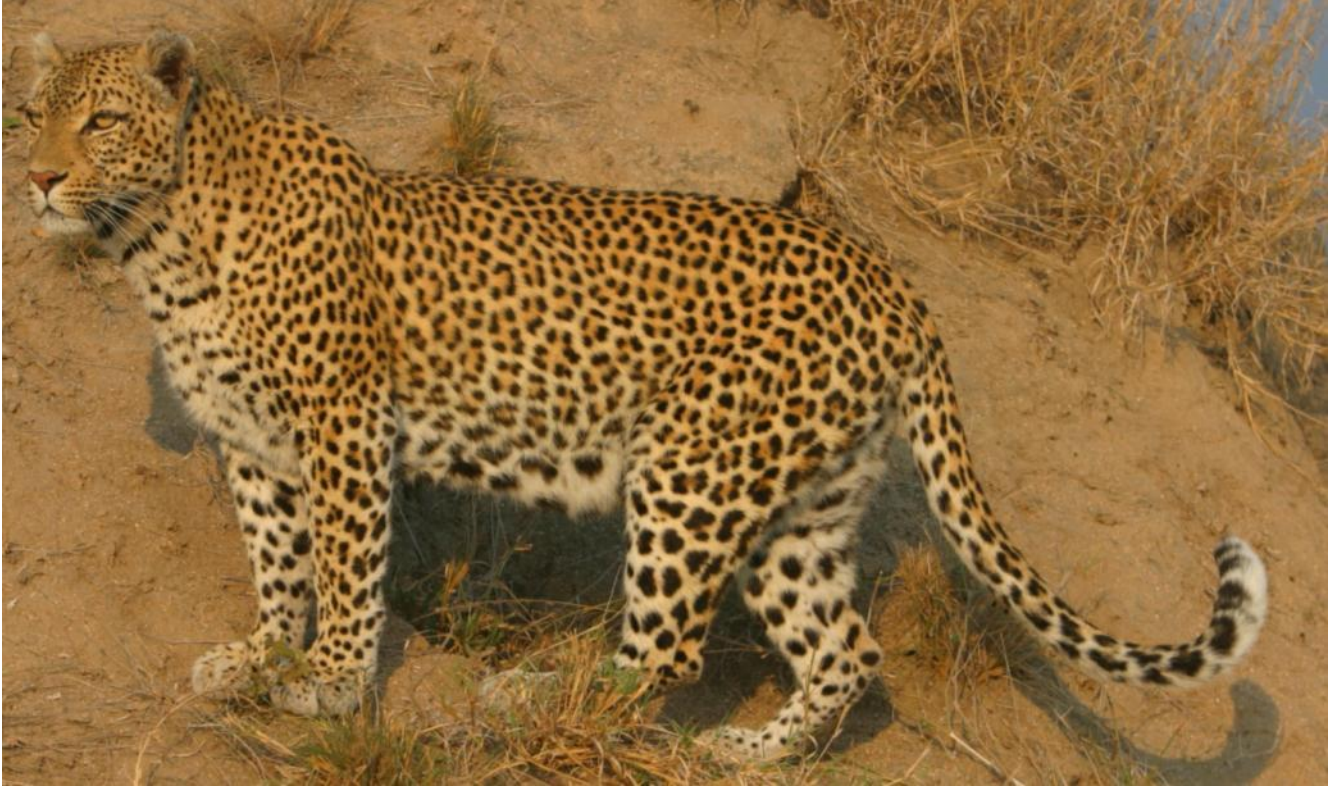

(25)

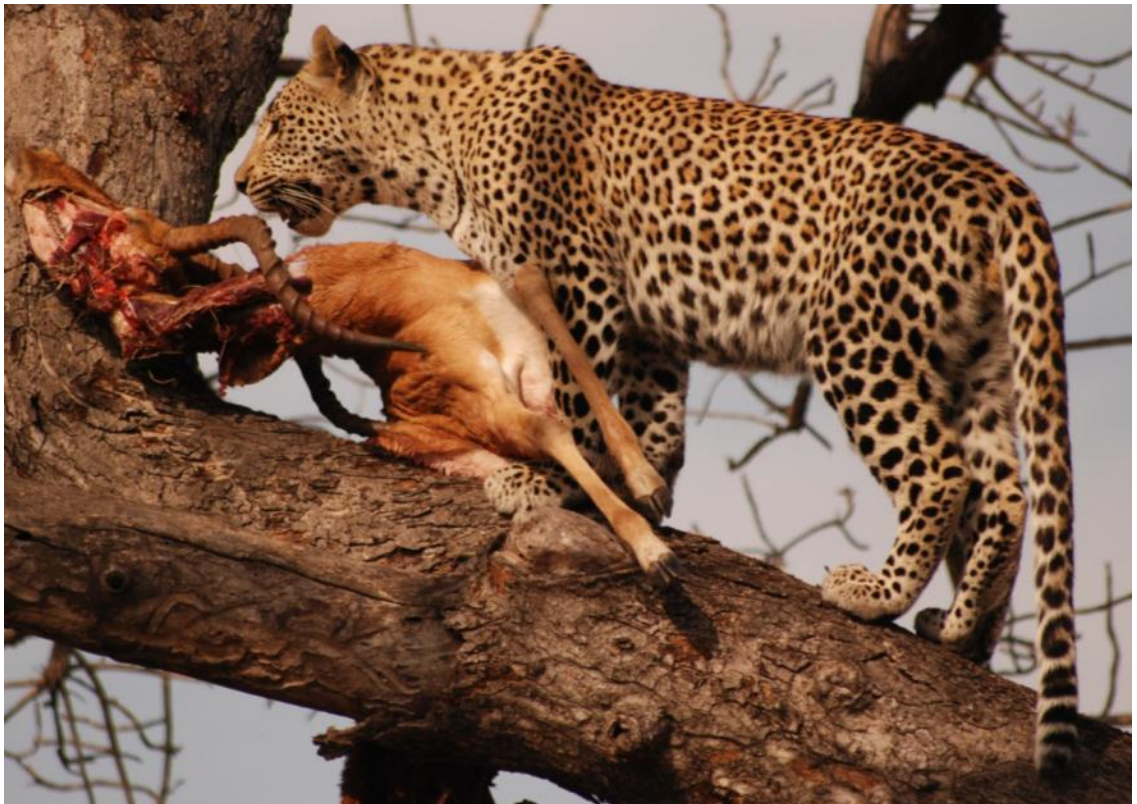

Supplement: pone.0123100.s001.pdf [file pone.0123100.s001.pdf]
